# Supplementary material for: lncRNA SNHG14 Plays a Role in Sepsis‐Induced Acute Kidney Injury by Regulating miR‐93
Source: Hindawi journal article supplement (doi:10.1155/2021/5318369), 2021-01-01
Supplement: f1 [file 5318369.f1.docx]

Table S1. Primers used in qPCR assays

| Genes | Primers | Sequence (5’-3’) |
| --- | --- | --- |
| SNHG14 | Forward | GGGTGTTTACGTAGACCAGAACC |
|  | Reverse | CTTCCAAAAGCCTTCTGCCTTAG |
| GAPDH | Forward | AATTCCATGGCACCGTCAAG |
|  | Reverse | TGGACTCCACGACGTACTC |
| TNF-α | Forward | GCTGCACTTTGGAGTGATCG |
|  | Reverse | CTTGTCACTCGGGGTTCGAG |
| IL-1β | Forward | CAGAAGTACCTGAGCTCGCC |
|  | Reverse | AGATTCGTAGCTGGATGCCG |
| IL-6 | Forward | AGTGAGGAACAAGCCAGAGC |
|  | Reverse | AGCTGCGCAGAATGAGATGA |
| miR-93 | Forward | TGCGGTTTGGCACTAGCACAT |
|  | Reverse | CCAGTGCAGGGTCCGAGGT |
| U6 | Forward | TGCGGGTGCTCGCTTCGGCAGC |
|  | Reverse | CCAGTGCAGGGTCCGAGGT |
| SNHG14 promoter | Forward | ATGGCTCCTCCACCTGGTAT |
|  | Reverse | GCCTGGCTGAACCATCAAAC |
